# Supplementary material for: Riboswitching with ciprofloxacin—development and characterization of a novel RNA regulator
Source: PubMed Central journal article supplement — Nucleic Acids Res. 2018 Jan 13;46(4):2121–32. doi: 10.1093/nar/gkx1319 (PMC5829644; doi:10.1093/nar/gkx1319), 2018-01-13
Supplement: gkx1319_supp.pdf [file gkx1319_supp.pdf]

## Supplementary material

# Riboswitching with ciprofloxacin – Development and characterization of a novel RNA regulator

Florian Groher <sup>1</sup>, Cristina Bofill-Bosch <sup>1</sup>, Christopher Schneider <sup>1</sup>, Johannes Braun <sup>1</sup>, Sven Jager <sup>2</sup>, Katharina Geißler <sup>1</sup>, Kay Hamacher <sup>2,3</sup>, Beatrix Suess <sup>1,\*</sup>

<sup>1</sup> *Synthetic Genetic Circuits, Dept. of Biology, TU Darmstadt, Darmstadt, Germany*

<sup>2</sup> *Computational Biology and Simulation, Dept. of Biology, TU Darmstadt, Darmstadt, Germany*

<sup>3</sup> *Dept. of Physics, Dept. of Computer Science, TU Darmstadt, Darmstadt, Germany*

\* To whom correspondence should be addressed. Tel: +49 6151 1622000; Fax: +49 6151 1622003; Email: bsuess@bio.tu-darmstadt.de

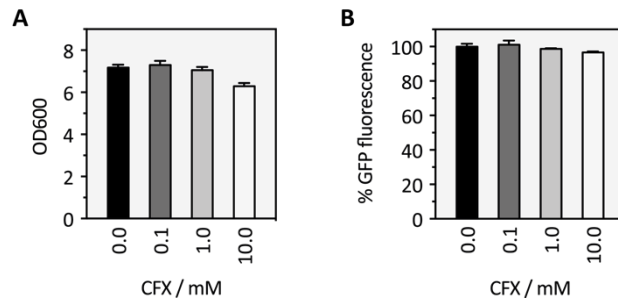

**Supplementary Figure S1. Influence of CFX on yeast growth and GFP expression.** **A** OD600 of yeast cultures grown overnight in media supplemented with the respective CFX concentration. **B** Relative GFP fluorescence of yeast cultures supplemented with the respective CFX concentration compared to untreated cells. Measurements were repeated three times with technical replicates.

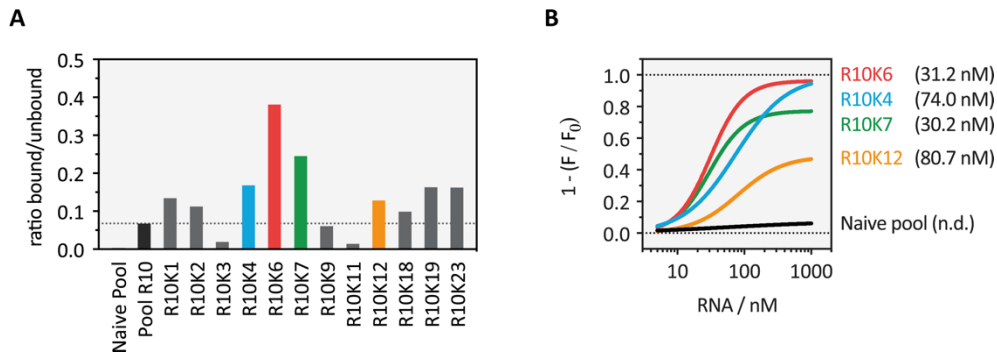

**Supplementary Figure S2. Analysis of single clone binding from round 10.** **A** Ratios of bound vs. unbound RNA for different clones from selection round 10 are displayed. As references, the naive pool and the pool from round 10 are depicted. According to the SELEX procedure, RNA was transcribed and 500 kcpm were loaded onto the CFX-derivatized column. After 10 wash steps with 1 CV binding buffer each, the RNA was eluted by 4 wash steps with 1 mM CFX in solution. Afterwards each fraction was measured on a scintillation counter. Measured radioactivity in the fractions flow through and wash steps were summed up (unbound) and also for elution fractions (bound). The ratio of bound to unbound gives a direct qualitative feedback of the binding capacity of the tested clones. **B** Determination of binding affinity of the selected aptamer candidates by fluorescence titration spectroscopy. Measurements were repeated at least twice. Standard deviations and individual data points were omitted for clarity. K<sub>D</sub> values are written in brackets.

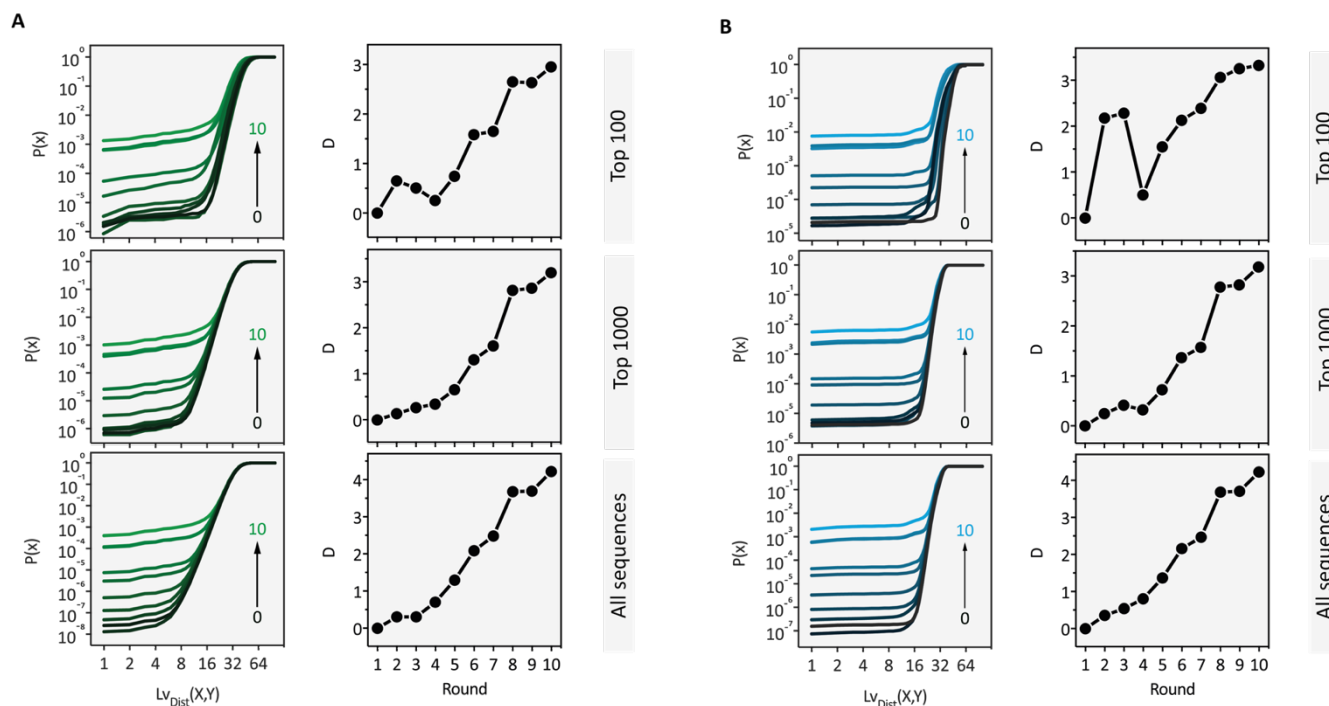

**Supplementary Figure S3. Next generation sequencing analysis** Displayed are the cumulative distribution function (CDF) and Kolmogorv Smirnov's ks test (D) for Top100, Top1000 and all sequences. **A** Results based on calculated minimal free energy (MFE) secondary structure. **B** Results based on sequence. The CDF for each round based on calculated Levenshtein distances on MFE structures is plotted for each round (left in A and B), resulting in an increased  $P(x)$  over the selection experiment. Based on CDF, D was derived and its logarithm is plotted against the selection rounds for Top100, Top1000 and all sequences (right panel in A and B). Here, D is computed between the first round and all remaining.

One major drawback is the computational time that it takes to compute a  $Lv_{Dist}(X,Y)$  distribution where we compare every sequence with every other (often  $10^{12}$  single computations). Due to this, advanced computational resources as well as efficient software and memory management is required. However, the data suggests that calculating all Levenshtein distances for each sequence and each round is not necessary and it is sufficient to look at the Top1000 enriched sequences to draw conclusions (at least in this SELEX experiment). This fact reduced the calculation efforts required by several orders of magnitude. We can conclude that comparing Top1000 vs all sequences by its Levenshtein distance can improve the process of SELEX round selection for future work. Additionally, using only the Top1000 made the computation feasible on a desktop computer by reducing the computational time by several orders of magnitude.

**Supplementary Table S1.** Plasmids used in this study

| <b>Name</b>  | <b>Description</b>                                                                        | <b>Reference</b> |
|--------------|-------------------------------------------------------------------------------------------|------------------|
| pWHE601      | 2 $\mu$ plasmid with constitutively expression of <i>gfp+</i> from an <i>adh</i> promoter | (1)              |
| pWHE601*     | Derived from pWHE601 with deletion of AUG in <i>gfp+</i> / AflIII --> Agel                | (2)              |
| 10A          | Active riboswitch found in initial <i>in vivo</i> screening                               | This work        |
| $\Delta$ AUG | Deletion of AUG within the sequence of 10A                                                | This work        |
| GOF          | Introduction of 7 point mutations in $\Delta$ AUG                                         | This work        |
| G1U          | Investigation of the named point mutation within $\Delta$ AUG                             | This work        |
| A11C         | Investigation of the named point mutation within $\Delta$ AUG                             | This work        |
| A25C         | Investigation of the named point mutation within $\Delta$ AUG                             | This work        |
| U47C         | Investigation of the named point mutation within $\Delta$ AUG                             | This work        |
| C51U         | Investigation of the named point mutation within $\Delta$ AUG                             | This work        |
| A56C         | Investigation of the named point mutation within $\Delta$ AUG                             | This work        |
| U61G         | Investigation of the named point mutation within $\Delta$ AUG                             | This work        |
| A35G         | Investigation of the named point mutation within $\Delta$ AUG                             | This work        |
| U41G         | Investigation of the named point mutation within $\Delta$ AUG                             | This work        |
| A50G         | Investigation of the named point mutation within $\Delta$ AUG                             | This work        |
| U92G         | Investigation of the named point mutation within $\Delta$ AUG                             | This work        |
| A102G        | Investigation of the named point mutation within $\Delta$ AUG                             | This work        |
| M1           | Mutation of the C31 and G32 to G and C within GOF, respectively                           | This work        |
| M1R          | Compensatory point mutations for M1 to restore function                                   | This work        |
| U37A         | Investigation of the named point mutation within GOF                                      | This work        |
| G72C         | Investigation of the named point mutation within GOF                                      | This work        |
| M2           | Mutation of GUU75 to CAA within GOF                                                       | This work        |
| M2R          | Compensatory mutations for M2 to restore pseudoknot and function                          | This work        |
| M3           | Mutation of G75C and C79G within GOF                                                      | This work        |
| M3R          | Compensatory mutations for M3 to restore pseudoknot and function                          | This work        |
| COMP         | Complementary sequence of GOF for investigation of basal expression                       | This work        |

Corresponding oligonucleotides for cloning are listed in Supplementary Table S2.

**Supplementary Table S2. Oligonucleotides used for cloning**

| <b>Name</b> | <b>Sequence (5'-&gt;3')</b>                                                             |
|-------------|-----------------------------------------------------------------------------------------|
| 10A_fwd     | CGCGACCGGTTGGAGACGCAACTGAATCAACATAAGTGAACGCGACTCTATCTCCCTAACTAGGAGTCATATAGCGGCAC        |
| 10A_rev     | GGCCGCTAGCCATTTTGTGACGCGACTAGTTACGGATCGTGTAACTCCGTGCCGCTATATGACTCCTAGTTTAGGGAGATAGAG    |
| ΔAUG_fwd    | CGCGACCGGTTGGAGACGCAACTGAATCAACATAAGTGAACGCGACTCTATCTCCCTAACTAGGAGTCATATAGCGGCAC        |
| ΔAUG_rev    | GGCCGCTAGCCATTTTGTGACGCGACTAGTTACGGATCGTGTAACTCCGTGCCGCTATATGACTCCTAGTTTAGGGAGATAGAG    |
| GOF_fwd     | CGCGACCGGTTGGAGACGCACCTGAATCAACATACGTGAACGCGACTCTATCTCCCAAATTAGGCGTCAGATAGCGGCACG       |
| GOF_rev     | GGCCGCTAGCCATTTTGTGACGCGACTAGTTACGGATCGTGTAACTCCGTGCCGCTATCTGACGCCTAATTTGGGGAG          |
| G1U_fwd     | CGCGACCGGTTGGAGACGCAACTGAATCAACATAAGTGAACGCGACTCTATCTCCCTAACTAGGAGTCATATAGCGGCAC        |
| G1U_rev     | GGCCGCTAGCCATTTTGTGACGCGACTAGTTACGGATCGTGTAACTCCGTGCCGCTATATGACTCCTAGTTTAGGGAGATAGAG    |
| A11C_fwd    | CGCGACCGGTTGGAGACGCACCTGAATCAACATAAGTGAACGCGACTCTATCTCCCTAACTAGGAGTCATATAGCGGC          |
| A11C_rev    | GGCCGCTAGCCATTTTGTGACGCGACTAGTTACGGATCGTGTAACTCCGTGCCGCTATATGACTCCTAGTTTAGGGAGATAG      |
| A25C_fwd    | CGCGACCGGTTGGAGACGCAACTGAATCAACATACGTGAACGCGACTCTATCTCCCTAACTAGGAGTCATATAGCGGC          |
| A25C_rev    | GGCCGCTAGCCATTTTGTGACGCGACTAGTTACGGATCGTGTAACTCCGTGCCGCTATATGACTCCTAGTTTAGGGAGATAG      |
| U47C_fwd    | CGCGACCGGTTGGAGACGCAACTGAATCAACATAAGTGAACGCGACTCTATCTCCCAAATTAGGAGTCATATAGCGGC          |
| U47C_rev    | GGCCGCTAGCCATTTTGTGACGCGACTAGTTACGGATCGTGTAACTCCGTGCCGCTATATGACTCCTAGTTTAGGGAGATAG      |
| C51U_fwd    | CGCGACCGGTTGGAGACGCAACTGAATCAACATAAGTGAACGCGACTCTATCTCCCTAAATTAGGAGTCATATAGCGGC         |
| C51U_rev    | GGCCGCTAGCCATTTTGTGACGCGACTAGTTACGGATCGTGTAACTCCGTGCCGCTATATGACTCCTAATTTAGGGAGATAG      |
| A56C_fwd    | CGCGACCGGTTGGAGACGCAACTGAATCAACATAAGTGAACGCGACTCTATCTCCCTAACTAGGCGTCATATAGCGGC          |
| A56C_rev    | GGCCGCTAGCCATTTTGTGACGCGACTAGTTACGGATCGTGTAACTCCGTGCCGCTATATGACGCCTAGTTTAGGGAGATAG      |
| U61G_fwd    | CGCGACCGGTTGGAGACGCAACTGAATCAACATAAGTGAACGCGACTCTATCTCCCTAACTAGGAGTCAGATAGCGGC          |
| U61G_rev    | GGCCGCTAGCCATTTTGTGACGCGACTAGTTACGGATCGTGTAACTCCGTGCCGCTATCTGACTCCTAGTTTAGGGAGATAG      |
| A35G_fwd    | CGCGACCGGTTGGAGACGCAACTGAATCAACATAAGTGAACGCGCTCTATCTCCCTAACTAGGAGTCATATAGCGGCAC         |
| A35G_rev    | GGCCGCTAGCCATTTTGTGACGCGACTAGTTACGGATCGTGTAACTCCGTGCCGCTATATGACTCCTAGTTTAGGGAGATAGAG    |
| U41G_fwd    | CGCGACCGGTTGGAGACGCAACTGAATCAACATAAGTGAACGCGACTCTAGCTCCCTAACTAGGAGTCATATAGCGGCAC        |
| U41G_rev    | GGCCGCTAGCCATTTTGTGACGCGACTAGTTACGGATCGTGTAACTCCGTGCCGCTATATGACTCCTAGTTTAGGGAGCTAGAG    |
| A50G_fwd    | CGCGACCGGTTGGAGACGCAACTGAATCAACATAAGTGAACGCGACTCTATCTCCCTAAGCTAGGAGTCATATAGCGGCAC       |
| A50G_rev    | GGCCGCTAGCCATTTTGTGACGCGACTAGTTACGGATCGTGTAACTCCGTGCCGCTATATGACTCCTAGCTTAGGGAGATAGAG    |
| U92G_fwd    | CGCGACCGGTTGGAGACGCAACTGAATCAACATAAGTGAACGCGACTCTATCTCCCTAACTAGGAGTCATATAGCGGCAC        |
| U92G_rev    | GGCCGCTAGCCATTTTGTGACGCGACTCGTTACGGATCGTGTAACTCCGTGCCGCTATATGACTCCTAGTTTAGGGAGATAGAG    |
| A102G_fwd   | CGCGACCGGTTGGAGACGCAACTGAATCAACATAAGTGAACGCGACTCTATCTCCCTAACTAGGAGTCATATAGCGGCAC        |
| A102G_rev   | GGCCGCTAGCCATTTTGTGACGCGACTAGTTACGGATCGTGTAACTCCGTGCCGCTATATGACTCCTAGTTTAGGGAGATAGAG    |
| M1_fwd      | CGCGACCGGTTGGAGACGCAACTGAATCAACATAAGTGAAGCCGACTCTATCTCCCTAACTAGGAGTCATATAGCGGC          |
| M1_rev      | GGCCGCTAGCCATTTTGTGACGCGACTAGTTACGGATCGTGTAACTCCGTGCCGCTATATGACTCCTAGTTTAGGG            |
| M1R_fwd     | - identical to M1_fwd -                                                                 |
| M1R_rev     | GGCCGCTAGCCATTTTGTGAGCCGACTAGTTACGGATCGTGTAACTCCGTGCCGCTATATGACTCCTAGTTTAGGGAGATAGAGTCG |
| U37A_fwd    | CGCGACCGGTTGGAGACGCACCTGAATCAACATACGTGAACGCGACTCTATCTCCCAAATTAGGCGTCAGATAGCGGC          |
| U37A_rev    | GGCCGCTAGCCATTTTGTGACGCGACTAGTTACGGATCGTGTAACTCCGTGCCGCTATCTGACGCCTAATTTGGGGAGATAGTG    |
| G72C_fwd    | CGCGACCGGTTGGAGACGCACCTGAATCAACATACGTGAACGCGACTCTATCTCCCAAATTAGGCGTCAGATAGCGGCACCG      |
| G72C_rev    | GGCCGCTAGCCATTTTGTGACGCGACTAGTTACGGATCGTGTAACTCCGTGCCGCTATCTGACGCCTAATTTGGGGAGATAGATC   |
| M2_fwd      | CGCGACCGGTTGGAGACGCACCTGAATCAACATACGTGAACGCGACTCTATCTCCCAAATTAGGCGTCAGATAGCGGC          |
| M2_rev      | GGCCGCTAGCCATTTTGTGACGCGACTAGTTACGGATCGTGTGTTGTCGGTGCCGCTATCTGACGCCTAATTTGGGGAGATAG     |
| M2R_fwd     | CGCGACCGGTTGGAGACGCACCTGAATCAACATACGTGAACGCGACTCTATCTCCCAAATTAGGCGTCAGATAGCGGCACGG      |
| M2R_rev     | GGCCGCTAGCCATTTTGTGACGCGACTACAAACGGATCGTGTGTTGTCGGTGCCGCTATCTGACGCCTAATTTGGGGAG         |
| M3_fwd      | CGCGACCGGTTGGAGACGCACCTGAATCAACATACGTGAACGCGACTCTATCTCCCAAATTAGGCGTCAGATAGCGGC          |
| M3_rev      | GGCCGCTAGCCATTTTGTGACGCGACTAGTTACGGATCGTCTAAGTCCGTGCCGCTATCTGACGCCTAATTTGGGGAGATAG      |
| M3R_fwd     | CGCGACCGGTTGGAGACGCACCTGAATCAACATACGTGAACGCGACTCTATCTCCCAAATTAGGCGTCAGATAGCGGCACG       |
| M3R_rev     | GGCCGCTAGCCATTTTGTGACGCGACTACTTAGGGATCGTCTAAGTCCGTGCCGCTATCTGACGCCTAATTTGGGGAGATAG      |
| COMP_fwd    | CGCGACCGGTACCTCTGCGTGGACTTAGTTGTATGCCTGCGCTGAGATAGAGGGTTAATCCGAGTCTATCCCGGTG            |
| COMP_rev    | GGCCGCTAGCCATTTTCACTGCGCTGATCAATGCCTAGCACATTGAGGCACGGCGATAGACTGCGGATTAACCCCTCTATCTC     |

**Supplementary Table S3.** Oligonucleotides used for cloning of doped pools for *in vivo* screening

| <b>Name</b>                       | <b>Sequence (5'-&gt;3')</b>                                                                                                                               |
|-----------------------------------|-----------------------------------------------------------------------------------------------------------------------------------------------------------|
| Agel_doped_fwd                    | GCATACAATCAACTCCAAGCTAGATCTACCGGT                                                                                                                         |
| NheI_[3.0/4.5/9.0/30.0]_doped_rev | CGAGCTAGCCATTTT[GTGACGCGACTAGTTACGGATCGTGTA ACTCCGTGCCGCTATATGACTCCTAGTTTAGGGAGATAGAGTCGCGTTCACTTATGTTGATTGAGTTGCGTCTCCC]ACCGGTAGATCTAGCTTGAGTTGATTGTATGC |

For all cloning steps Agel\_doped\_fwd was used for PCR. For generating different degrees of randomization, the part in brackets of NheI\_ATG\_Kozac\_doped\_rev was synthesized with mixed phosphoramidites for 3.0%, 4.5%, 9.0% and 30.0% incorporation of the other three bases.

**Supplementary Table S4.** Oligonucleotides and barcodes used for Illumina sequencing

| <b>Name</b>  | <b>Round</b> | <b>Barcode</b> | <b>Sequence (5'-&gt;3')</b> |
|--------------|--------------|----------------|-----------------------------|
| Seq_IL_fwd   | -            | -              | GGGAGACGCAACTGAATGAA        |
| Seq_IL_rev0  | 0            | GTGT           | ACACGTGACGCGACTAGTTACGGA    |
| Seq_IL_rev1  | 1            | ACAC           | GTGTGTGACGCGACTAGTTACGGA    |
| Seq_IL_rev2  | 2            | ATAT           | ATATGTGACGCGACTAGTTACGGA    |
| Seq_IL_rev3  | 3            | AGAG           | CTCTGTGACGCGACTAGTTACGGA    |
| Seq_IL_rev4  | 4            | TATA           | TATAGTGACGCGACTAGTTACGGA    |
| Seq_IL_rev5  | 5            | TCTC           | GAGAGTGACGCGACTAGTTACGGA    |
| Seq_IL_rev6  | 6            | TGTG           | CACAGTGACGCGACTAGTTACGGA    |
| Seq_IL_rev7  | 7            | CACA           | TGTGGTGACGCGACTAGTTACGGA    |
| Seq_IL_rev8  | 8            | CGCG           | CGCGGTGACGCGACTAGTTACGGA    |
| Seq_IL_rev9  | 9            | CTCT           | AGAGGTGACGCGACTAGTTACGGA    |
| Seq_IL_rev10 | 10           | GAGA           | TCTCGTGACGCGACTAGTTACGGA    |



**Supplementary Table S5.** Oligonucleotides for template generation for *in vitro* transcription

| Name            | Sequence (5'→3')                                                                                |
|-----------------|-------------------------------------------------------------------------------------------------|
| 10A_T7_fwd      | CCAAGTAATACGACTCACTATAGGGAGACGCAACTGAATGAACATAAGTGAAC<br>GCGACTCTATCTCCCTAACTAGG                |
| 10A_T7_rev      | GTGACGCGACTAGTTACGGATCGTGTA ACTCCGTGCCGCTATATGACTCCTAGTT<br>TAGGGAGATAGAGTCGCGTTC               |
| ΔAUG_T7_fwd     | CCAAGTAATACGACTCACTATAGGGAGACGCAACTGAATCAACATAAGTGAACGC<br>GACTCTATCTCCCTAACTAGG                |
| ΔAUG_T7_rev     | - identical to 10A_T7_rev -                                                                     |
| GOF_T7_fwd      | CCAAGTAATACGACTCACTATAGGGAGACGCACCTGAATCAACATACGTGAACGC<br>GACTCTATCTCCCAAATTAGGCGTCAG          |
| GOF_T7_rev      | GTGACGCGACTAGTTACGGATCGTGTA ACTCCGTGCCGCTATCTGACGCCTAATT<br>TGGGGAGATAGAGTCGCGTTCACG            |
| U37A_T7_fwd     | CCAAGTAATACGACTCACTATAGGGAGACGCACCTGAATCAACATACGTGAACGC<br>GACTATCTCCCAAATTAGGCG                |
| U37A_T7_rev     | GTGACGCGACTAGTTACGGATCGTGTA ACTCCGTGCCGCTATCTGACGCCTAATT<br>TGGGGAGATAGTGTGCGGTTACG             |
| G72C_T7_fwd     | CCAAGTAATACGACTCACTATAGGGAGACGCACCTGAATCAACATACGTGAACGC<br>GACTCTATCTCCCAAATTAGGCG              |
| G72C_T7_rev     | GTGACGCGACTAGTTACGGATCGTGTA ACTCGGTGCCGCTATCTGACGCCTAATT<br>TGGGGAGATAGAGTCGCGTTCACG            |
| GOF_CAA4_T7_fwd | - identical to GOF_T7_fwd -                                                                     |
| GOF_CAA4_T7_rev | TTGTTGTTGTTGTGACGCGACTAGTTACGGATCGTGTA ACTCCGTGCCGCTATCT<br>GACGCCTAATTTGGGGAGATAGAGTCGCGTTCACG |

**Supplementary Table S6.** Detailed summary of the CFX selection process

| Round | Negative selection | CFX col. [mM] | # Pre-elution [CV] | # Buffer washes [CV] | Specific elution | Eluent     | # Elution steps [CV] | % Input eluted |
|-------|--------------------|---------------|--------------------|----------------------|------------------|------------|----------------------|----------------|
| 1     | yes                | 0.6           | -                  | 10                   | -                | 20 mM EDTA | 4                    | 0.2%           |
| 2     | yes                | 0.6           | -                  | 10                   | -                | 20 mM EDTA | 4                    | 0.3%           |
| 3     | yes                | 0.6           | -                  | 10                   | -                | 20 mM EDTA | 4                    | 0.3%           |
| 4     | -                  | 0.6           | -                  | 10                   | -                | 20 mM EDTA | 4                    | 4.2%           |
| 5     | -                  | 0.4           | -                  | 20                   | -                | 20 mM EDTA | 4                    | 2.9%           |
| 6     | -                  | 0.4           | -                  | 20                   | yes              | 1 mM CFX   | 4                    | 8.1%           |
| 7     | -                  | 0.4           | 3                  | 20                   | yes              | 1 mM CFX   | 4                    | 4.5% *         |
| 8     | -                  | 0.4           | 4                  | 20                   | yes              | 1 mM CFX   | 4                    | 0.4% *         |
| 9     | -                  | 0.4           | -                  | 20                   | yes              | 1 mM CFX   | 4                    | 18.1%          |
| 10    | -                  | 0.04          | -                  | 20                   | yes              | 1 mM CFX   | 4                    | 6.0%           |

The amount of immobilized CFX was estimated by fluorescence measurement of the derivatized solid support.

CV = column volume

\* 23.3% and 4.7% of pre-eluted RNA were discarded in round 7 and 8, respectively

**Supplementary Table S7. Randomized regions from clones round 10**

| Clone  | Frequency | Sequence (5'->3')                                                        | Length* |
|--------|-----------|--------------------------------------------------------------------------|---------|
| R10K1  | 1         | TCAGTGGCATTTCAAACACCAATTTGACGAAAAGAAGACTTAGTGAATACTAAGCGGAATTAAC         | 104     |
| R10K2  | 3         | AACCAAACAGTTCATCAAGACCTAGGTATCTAGAACTAGCACGTCCGGATATGTCGGTA              | 101     |
| R10K3  | 2         | ATCAGCATCCCTACAGAGGAAGTACCGCACACTATTGTGGAAAGGCCAGATTC                    | 93      |
| R10K4  | 5         | GAGGTTCCCTATCATTACAGACG <u>CTGCTTCGGCAGT</u> AACTAGAAATGTCCGGCCACTACGTG  | 102     |
| R10K6  | 4         | AATGTCATTCAAGACTAGGTTGTGACTGCTTAGGCAGTTGTGGACGGCTAAGCCCACCAGAGG          | 103     |
| R10K7  | 1         | TTGATTTCCCGTGATGAAAAGAAGACTGCTTCGGCAGCGGAAGGAAAGTTTTCGGACCCTCCA          | 103     |
| R10K9  | 1         | TGCTGAGGACATTAGTAGCAAGTTCTCTGCTTCGGCAGGCAAATTTGGCAAGTCAGCT               | 98      |
| R10K11 | 1         | CGCAATTCATTTTCACTAGGTCGTGCTTGAAAAAGTGTGGAGCCAGACTAATTAGCATCAGGG          | 104     |
| R10K12 | 1         | GTAGGTTCCCTATCATTACAGACG <u>CTGCTTCGGCAGT</u> AACTAGAAATGTCCGGCCACTACGTG | 103     |
| R10K13 | 1         | GAGGTTCCCTATCATTACAGACG <u>CTGCTTCGGCGTA</u> AACTAGAAATGTCCGGCCACTACGTG  | 102     |
| R10K18 | 1         | CGTGGCCGAGCATACATCGTATCGGCCTGCTTCGACCAGGTCGGCCCTGGCG                     | 92      |
| R10K19 | 1         | GACCGTCATTCATGAGTTCTTACGTGCTGCTTCGGCAGGGGGAGAATGGCTCGGACTTAAATGG         | 104     |
| R10K23 | 1         | CGAACTTCAACTAAACACTCCGATGTAATAACTAGCATCGTAGCCTGTCCCTGCGATAAAGGAG         | 104     |

Sequences found in SELEX round 10. Both, 5'- and 3'-regions are removed for clarity.

The reported stem loop (5'-CTGCTTCGGCAG-3') is underlined allowing for one mismatch/mutation.

\* including constant regions.





**Supplementary Table S9.**  $K_D$  and regulatory activity of selected fluoroquinolones

| <b>Fluoroquinolone</b> | <b><math>K_D</math> / nM</b> | <b>Activity / x-fold</b> |
|------------------------|------------------------------|--------------------------|
| EFX *                  | 61.3 (1.5)                   | 3.1 (0.1)                |
| CFX                    | 64.2 (1.8)                   | 7.5 (0.3)                |
| DFX                    | 137.1 (10.6)                 | 4.2 (0.7)                |
| NFX                    | 182.6 (22.1)                 | 2.7 (0.2)                |
| EX                     | 236.6 (52.9)                 | 2.8 (0.1)                |
| hCFX                   | 366.7 (67.2)                 | 0.8 (0.0)                |
| dCFX                   | 829.8 (118.0)                | 1.7 (0.2)                |
| PA                     | 916.1 (195.9)                | 2.8 (0.2)                |

For every fluoroquinolone, the dissociation constant ( $K_D$ ) was determined by fluorescence titration and activity *in vivo* was measured by standard GFP fluorescence assay using the CFX-riboswitch. The standard deviation ( $\pm$  SD) is reported in brackets for the titration experiments and regulatory activity, respectively.

\* EFX reduced the growth rate of yeast approx. 10-fold [data not shown].

## Supplementary references

1. Sues, B., Hanson, S., Berens, C., Fink, B., Schroeder, R. and Hillen, W. (2003) Conditional gene expression by controlling translation with tetracycline-binding aptamers. *Nucleic Acids Res.*, 31, 1853–1858.
2. Schneider, C. and Sues, B. (2016) Identification of RNA aptamers with riboswitching properties. *Methods*, 97, 44–50.
